# Supplementary material
Source: PubMed Central journal article supplement (PMC5705043)
Supplement: NIHMS920510-supplement-Appendix.pdf [file NIHMS920510-supplement-Appendix.pdf]

**Acknowledgements:**

We thank the following individuals for their contributions to enrollment of subjects, data collection and image acquisition and study coordination: Echocardiographic Core Laboratory: Steven Colan, MD; Renee Margossian, MD; Steven O'Neill; Cheryl O'Brien; Edward Marcus; Children's Hospital Boston: Jane W. Newburger, MD MPH; Elif Seda Selamet Tierney, MD; Marga Rivera, Carolyn Dunbar-Masterson, RN MSN; The Children's Hospital of Philadelphia: Victoria Vetter, MD, MPH, Jack Rychik, MD, Beth Kaufman, MD, Stanford Ewing, MD Maryanne Chrisant, MD\*, Nicole Mirarchi RN, BSN, MS, Agbenu Ejembi, RN, BSN, Michele Toms, RN, Marie Sheedy, RN, Jamie Koh, RN, Laverne Murphy, BA, Katherine Lee, RN, Stephanie Kren, Francine Gordon, Barbara Yeutter; Columbia University Medical Center: Wyman Lai, MD; Karen Altmann, MD; Beth Printz\*, MD, PhD ;Ella Tokar, Rosalind Korsin, RN; Ashwin Prakash, MD\*, Seema Mital, MD. FACC\*; North Carolina Consortium-Duke University Medical Center, East Carolina University, Wake Forest University: Page Anderson, MD (deceased), Michael Camitta, MD; Piers Barker, MD, Jennifer S. Li, MD; Mingfen Xu, RN MSN; Charlie Sang, MD, Wesley Covitz MD, Amanda Cook, MD; Karen Lurito, MD, Melanie Simms, Malissa Moore; The Hospital for Sick Children: Brian McCrindle, MD MPH; Fraser Golding, MD; Timothy Bradley, MD, Nancy Slater; Cameron Storch, Elizabeth Radojewski, RN; Medical University of South Carolina: J. Philip Saul, MD, Girish Shirali, MD, Andrew M. Atz, MD; Anthony Hlavacek, MD; Teresa Atz, RN,MSN; Karen Chessa; Dawn Fleming; Primary Children's Medical Center and the University of Utah: L. LuAnn Minich, MD; Lloyd Y. Tani, MD, Alice Olson\*, Shala Smith\*, Linda Lambert, Marian Shearrow; Washington University, St. Louis: Charles E. Canter, Tim Sekarski, Debra Hicks; Data Coordinating Center, New England Research Institutes: Lynn Sleeper\*, Dianne Gallagher\*, Marty Christiansen\*, Dinh Tran\*, Yanli Wang\*, Shan Chen\*, Danielle Hollenbeck-Pringle\*, Minmin Lu\*, Felicia Trachtenberg; National Heart, Lung, and Blood Institute: Gail D. Pearson, MD, ScD, Victoria Pemberton, RNC, BS, CCRC, Mario Stylianou, PhD, and the Network Chair, Lynn Mahony, MD.

We also thank:

Protocol Review Committee: Michael Artman (Chair); Erle Austin; Timothy Feltes, Julie Johnson, Thomas Klitzner, Jeffrey Krischer, G. Paul Matherne.

Data and Safety Monitoring Board: John Kugler (Chair); Rae-Ellen Kavey, Executive Secretary; David J. Driscoll, Mark Galantowicz, Sally A. Hunsberger, Thomas J. Knight, Holly Taylor, Catherine L. Webb

\*no longer at the institution listed
